# Supplementary material for: Cascading reconstruction to induce highly disordered Fe–Ni(O)OH toward enhanced oxygen evolution reaction
Source: Royal Society of Chemistry journal article supplement (doi:10.1039/d2ta00597b), 2022-01-01
Supplement: d2ta00597b1.pdf [file d2ta00597b1.pdf]

## Supporting Information

### **Cascading reconstruction to induce highly disordered Fe-Ni(O)OH toward enhanced oxygen evolution reaction†**

Wei Hua<sup>a</sup>, Huanhuan Sun<sup>a</sup>, Mingwei Jiang<sup>a</sup>, Lingbo Ren<sup>a</sup>, Yu Zhang<sup>b,\*</sup>, Jian-Gan Wang<sup>a,\*</sup>

<sup>a</sup> State Key Laboratory of Solidification Processing, Center for Nano Energy Materials, School of Materials Science and Engineering, Northwestern Polytechnical University and Shaanxi Joint Lab of Graphene (NPU), Xi'an 710072, China

<sup>b</sup> School of Mechanical and Power Engineering, East China University of Science and Technology, 130 Meilong Road, Shanghai 200237, China

\*Corresponding Author E-mail: wangjiangan@nwpu.edu.cn (J.-G. Wang); yzhang071@ecust.edu.cn (Y. Zhang)

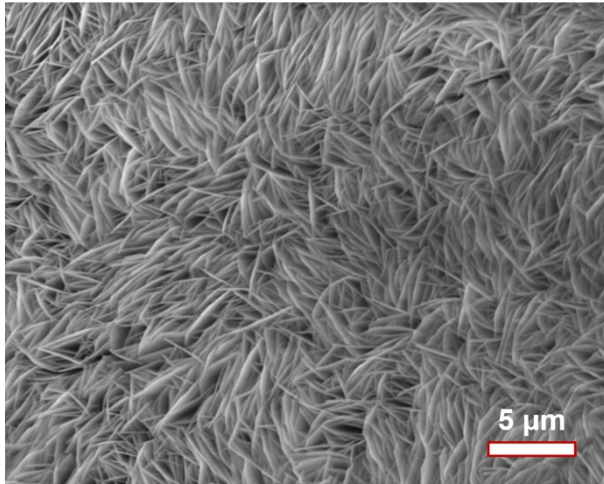

**Fig. S1.** The SEM image of Ni(OH)<sub>2</sub>.

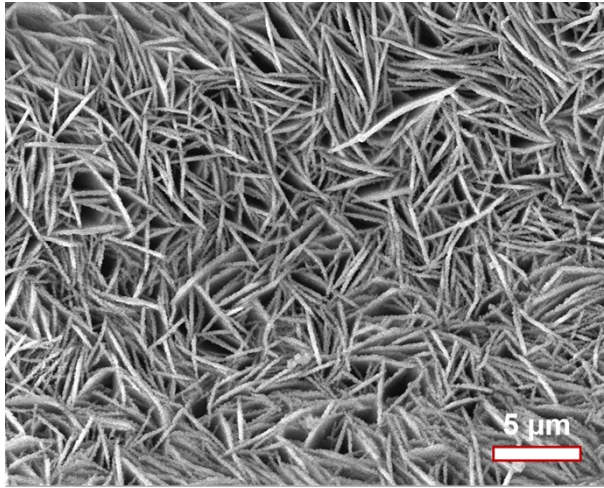

**Fig. S2.** The SEM image of NiHCF/Ni(OH)<sub>2</sub>.

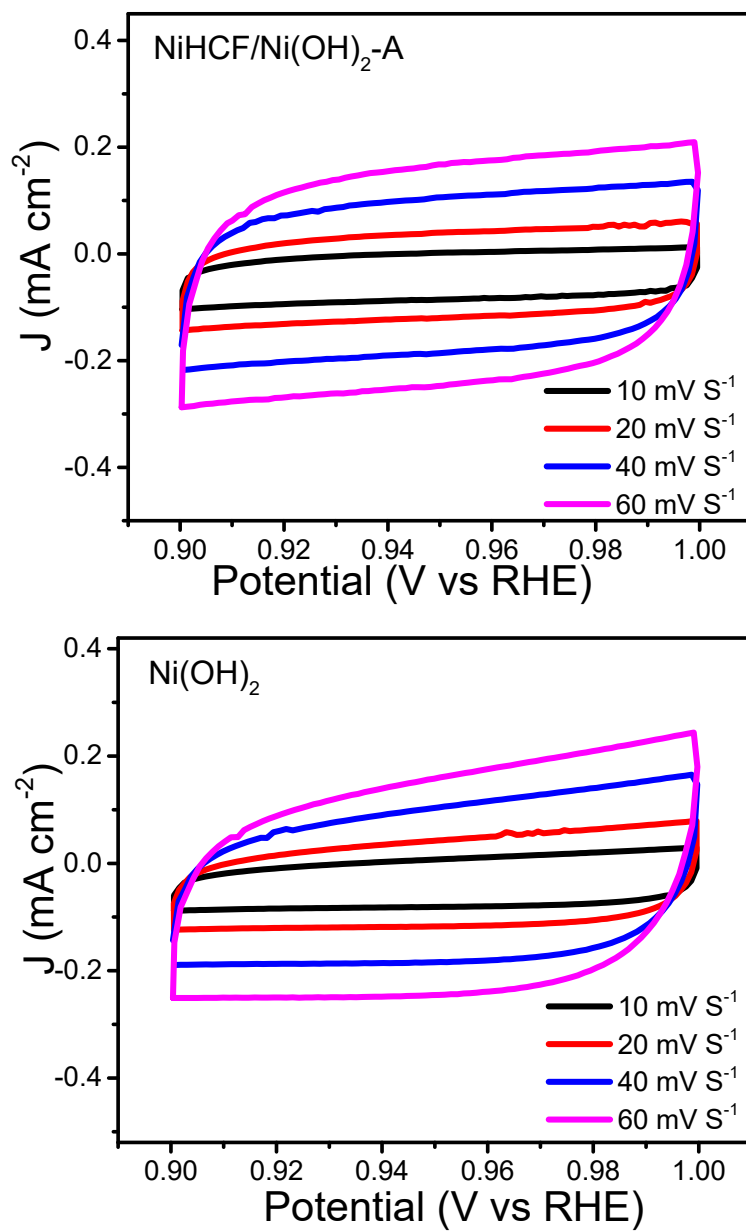

**Fig. S3.** CV curves at different scan rates for NiHCF/Ni(OH)<sub>2</sub>-A and Ni(OH)<sub>2</sub>.

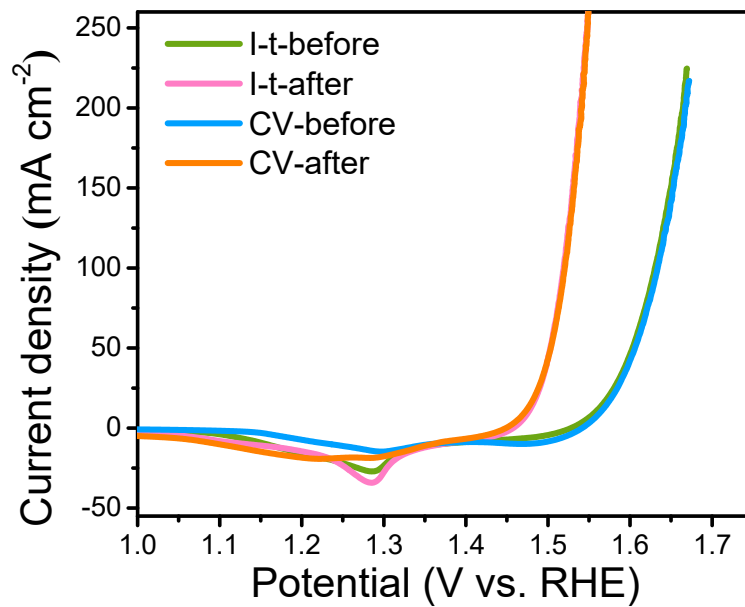

**Fig. S4.** LSV curves of NiHCF/Ni(OH)<sub>2</sub> before and after I-t and CV tests.

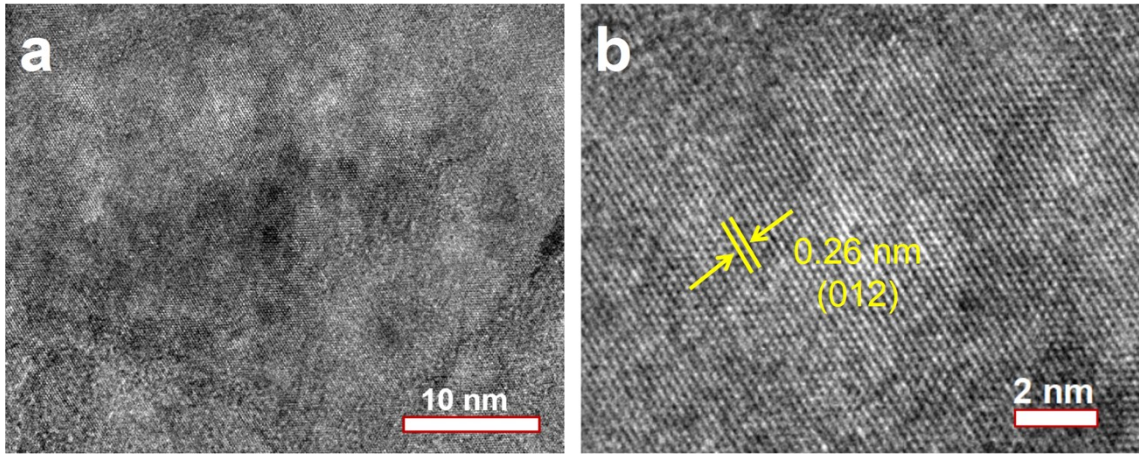

**Fig. S5.** HRTEM images of Ni(OH)<sub>2</sub>.

Table S1. A comparison of the OER activities of the as-activated NiHCF/Ni(OH)<sub>2</sub>-A with reported reconstructed electrocatalysts.

| Catalyst                          | $\eta$ (mV) | Current density<br>(mA cm <sup>-2</sup> ) | Reference |
|-----------------------------------|-------------|-------------------------------------------|-----------|
| Fe <sub>0.052</sub> Ni-POMo       | 255.3       | 10                                        | 1         |
| NiFe <sub>0.5</sub> Sn-A          | 260         | 10                                        | 2         |
| CR-NiOOH                          | 278.2       | 10                                        | 3         |
| Cu <sub>2</sub> S-derived CuO/ CF | 286         | 10                                        | 4         |
| Mo <sub>1</sub> -CoOOH@CP         | 274         | 10                                        | 5         |
| aMOF-NC                           | 249         | 10                                        | 6         |
| SELF-RECONCAT                     | 270         | 50                                        | 7         |
| NiHCF/Ni(OH) <sub>2</sub> -A      | 242         | 10                                        | This work |
| NiHCF/Ni(OH) <sub>2</sub> -A      | 272         | 50                                        | This work |
| NiHCF/Ni(OH) <sub>2</sub> -A      | 289         | 100                                       | This work |

## References

1. X. Liu, F. Xia, R. Guo, M. Huang, J. Meng, J. Wu and L. Mai, *Adv. Funct. Mater.*, 2021, **31**, 2101792.
2. M. Chen, S. Lu, X.-Z. Fu and J.-L. Luo, *Adv. Sci.*, 2020, **7**, 1903777.
3. X. Liu, J. Meng, K. Ni, R. Guo, F. Xia, J. Xie, X. Li, B. Wen, P. Wu, M. Li, J. Wu, X. Wu, L. Mai and D. Zhao, *Cell Rep. Phys. Sci.*, 2020, **1**, 100241.
4. Y. Zuo, Y. Liu, J. Li, R. Du, X. Han, T. Zhang, J. Arbiol, N. J. Divins, J. Llorca, N. Guijarro, K. Sivula and A. Cabot, *Chem. Mater.*, 2019, **31**, 7732-7743.
5. Y. Zhang, H. Guo, P. Yuan, K. Pang, B. Cao, X. Wu, L. Zheng and R. Song, *J. Power Sources*, 2019, **442**, 227252.
6. C. Liu, J. Wang, J. Wan, Y. Cheng, R. Huang, C. Zhang, W. Hu, G. Wei and C. Yu, *Angew. Chem. Int. Ed.*, 2020, **59**, 3630-3637.
7. Y. Wang, Y. Zhu, S. Zhao, S. She, F. Zhang, Y. Chen, T. Williams, T. Gengenbach, L. Zu, H. Mao, W. Zhou, Z. Shao, H. Wang, J. Tang, D. Zhao and C. Selomulya, *Matter*, 2020, **3**, 1-14.
